# Supplementary material for: Novel late-stage radiosynthesis of 5-[18F]-trifluoromethyl-1,2,4-oxadiazole (TFMO) containing molecules for PET imaging
Source: PubMed Central journal article supplement (PMC8139947; doi:10.1038/s41598-021-90069-x), 2021-05-21
Supplement: 41598_2021_90069_MOESM1_ESM.pdf [file 41598_2021_90069_MOESM1_ESM.pdf]

## Supporting Information

### **Novel late-stage radiosynthesis of the 5-[<sup>18</sup>F]-trifluoromethyl-1,2,4-oxadiazole (TFMO) containing molecules for PET imaging**

**Nashaat Turkman\*, Daxing Liu and Isabella Pirola**

#### **Table of Contents**

|                                                                                                                                              |   |
|----------------------------------------------------------------------------------------------------------------------------------------------|---|
| Semi-preparative high performance liquid chromatography (HPLC) purification of [ <sup>18</sup> F]TMP195                                      | 2 |
| Semi-preparative high performance liquid chromatography (HPLC) purification for the <sup>19</sup> F to [ <sup>18</sup> F] exchange reaction: | 3 |

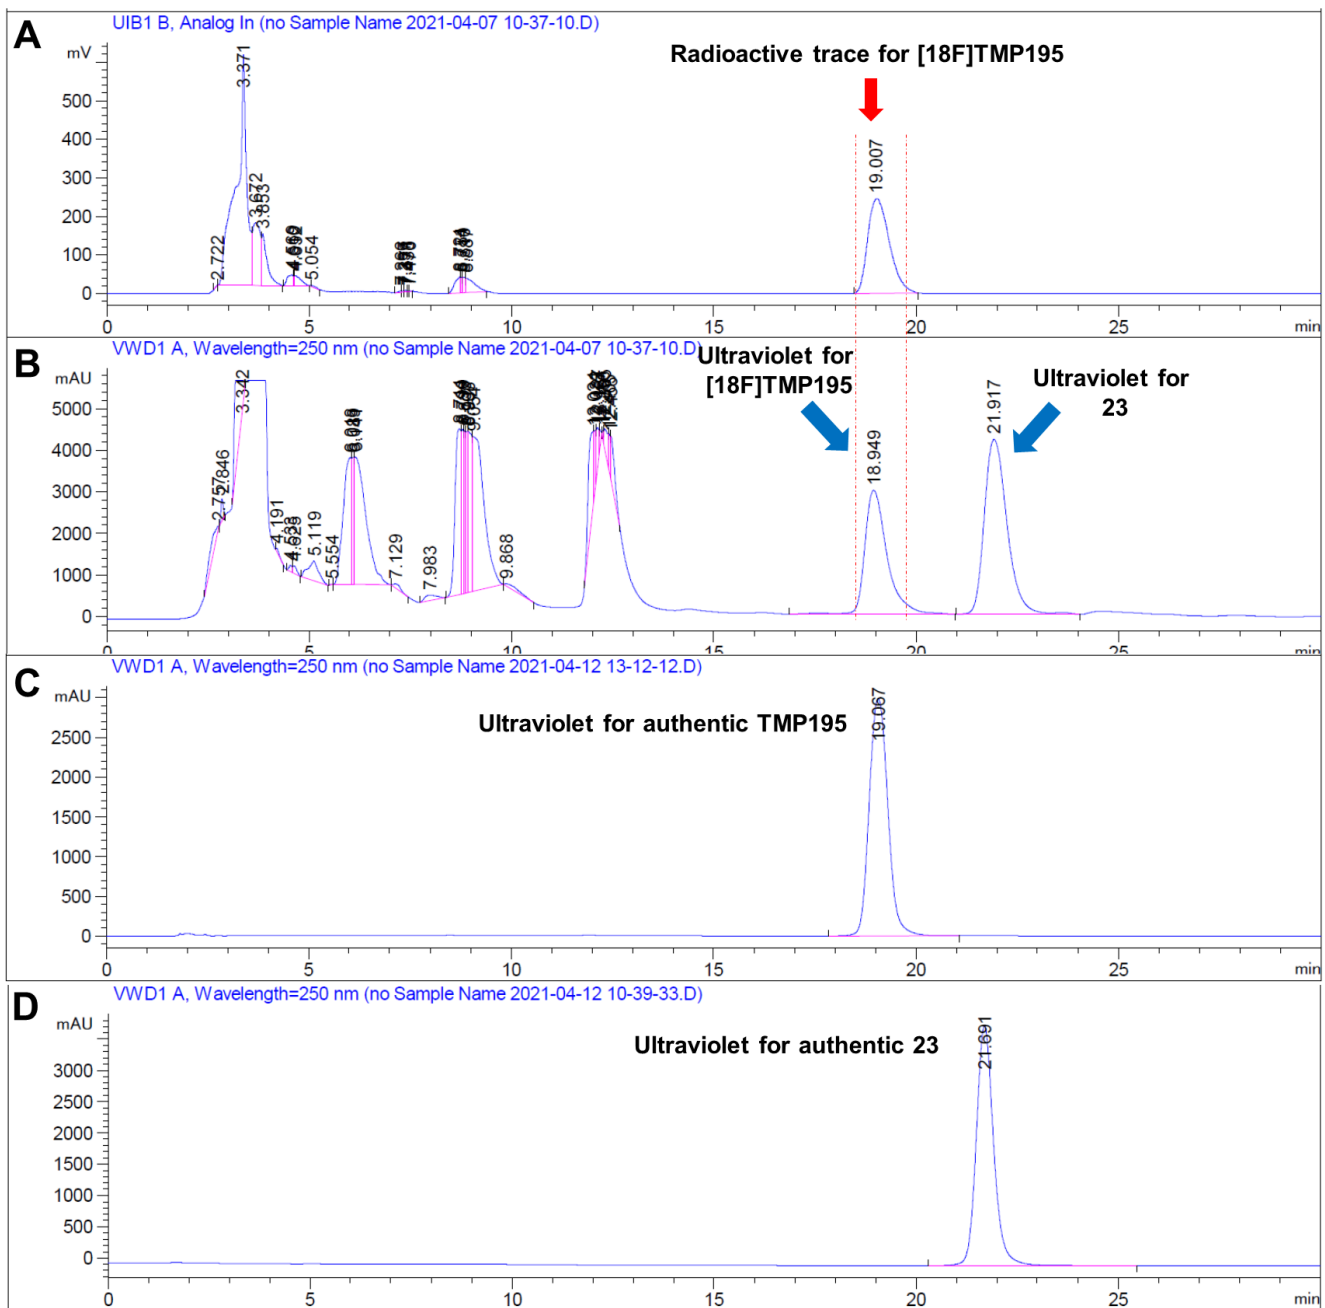

**Figure 1.** Semi-preparative high performance liquid chromatography (HPLC) purification of  $[^{18}\text{F}]\text{TMP195}$  (a) radioactive peak of  $[^{18}\text{F}]\text{TMP195}$  in crude mixture detected with radioactivity detector, (b)  $[^{18}\text{F}]\text{TMP195}$  associated non-radioactive mass and unreacted **23** in the crude reaction mixture were detected with ultraviolet detector, (c) authentic TMP195 detected with ultraviolet detector and (d) authentic **23** detected with ultraviolet detector. Dashed lines shows start and stop of  $[^{18}\text{F}]\text{TMP195}$  collection which demonstrate high radiochemical purity and significant separation from the labeling precursor **23** and other radioactive peaks.

**$^{19}\text{F}$  to  $^{18}\text{F}$  exchange reaction:** The reaction was conducted under the same condition used for generating  $^{18}\text{F}$ TMP195 except for starting with the non-radioactive TMP195 (6-8 mg). This experiment demonstrates that the exchange  $^{19}\text{F}$  to  $^{18}\text{F}$  exchange reaction did not occur. TMP195 remained unchanged.

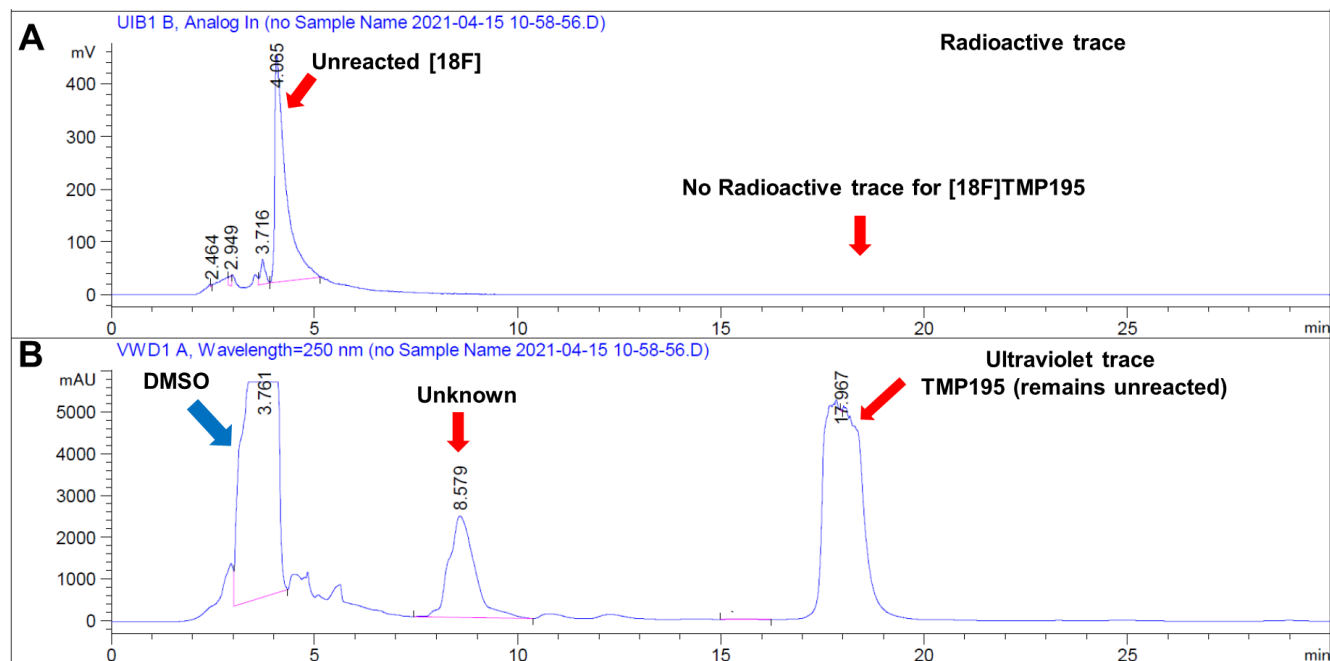

**Figure 2.** Semi-preparative high performance liquid chromatography (HPLC) purification for the  $^{19}\text{F}$  to  $^{18}\text{F}$  exchange reaction: (a) radioactive peak of the crude mixture detected with radioactivity detector showed no trace for  $^{18}\text{F}$ TMP195, (b) Ultraviolet associated nonradioactive crude mixture detected with ultraviolet detector demonstrates that TMP195 remained unreacted in the crude reaction mixture.
